# Supplementary material
Source: PubMed Central journal article supplement (PMC3896981)
Supplement: NIHMS309198-supplement-01.pdf [file NIHMS309198-supplement-01.pdf]

**Supplemental Table. Variables tested in Cox proportional hazards regression models.**

---

**Main effect variable<sup>a</sup>**

No IM vs IM pretransplant

**Patient related:**

Age at transplant:  $\leq 30$  vs 31-40 vs 41-50 vs  $> 50$  years

Gender: male vs female

Karnofsky performance at transplant:  $> 80\%$  vs  $\leq 80\%$  vs unknown

Race: White vs. non-White

**Disease related:**

Time from diagnosis to transplant:  $\leq 12$  months vs  $> 12$  months

**Transplant related:**

Donor type: HLA-identical sibling vs related vs unrelated

Donor recipient gender match: M-M vs M-F vs F-M vs F-F

Donor-recipient HLA match: well match vs partially match vs mismatch vs unknown

Donor-recipient CMV status: -/- vs +/+ vs +/- vs -/+

Conditioning regimen: myeloablative vs non-myeloablative

Source of stem cells: bone marrow vs peripheral blood

Year of transplant: 1999-2000 vs 2001-2002 vs 2003-2004

GVHD prophylaxis: MTX+CsA +/-other vs CsA +/- other vs MTX+FK506 +/- other vs FK506 +/- other vs T-cell depletion.

---

<sup>a</sup> Included in all models.
